# Supplementary material for: Hierarchical nanostructured MnCo2O4–NiCo2O4 composites as innovative electrodes for supercapacitor applications
Source: Royal Society of Chemistry journal article supplement (doi:10.1039/c8nj03764g), 2018-01-01
Supplement: c8nj03764g1.pdf [file c8nj03764g1.pdf]

## **Supporting Information**

### **Hierarchical nanostructured MnCo<sub>2</sub>O<sub>4</sub>-NiCo<sub>2</sub>O<sub>4</sub> composite as an innovative electrode for supercapacitor applications**

Han-Min Lee,<sup>a</sup> Chandu V.V. Muralee Gopi,<sup>a\*</sup> Prem Jyoti Singh Rana,<sup>a</sup> Rajangam Vinodh,<sup>a</sup>  
Sanghyun Kim,<sup>b</sup> R. Padma<sup>c,d</sup> and Hee-Je Kim<sup>\*a</sup>

<sup>a</sup> *School of Electrical and Computer Engineering, Pusan National University, Busandaehak-ro 63 beon-gil, Geumjeong-gu, Busan, 46241, South Korea.*

<sup>b</sup> *Department of Civil and Environmental Engineering, Pusan National University, Busan 46241, South Korea.*

<sup>c</sup> *Department of Physics, Sri Venkateswara University, Tirupati 517 502, India*

<sup>d</sup> *School of Mechanical Engineering, Yonsei University, Seoul 120-749, Republic of Korea*

\*Corresponding authors. Tel.: +82 51 510 2364; fax: +82 51 513 0212

E-mail: [naga5673@gmail.com](mailto:naga5673@gmail.com) (C.V.V.M. Gopi); [heeje@pusan.ac.kr](mailto:heeje@pusan.ac.kr) (H.-J. Kim)

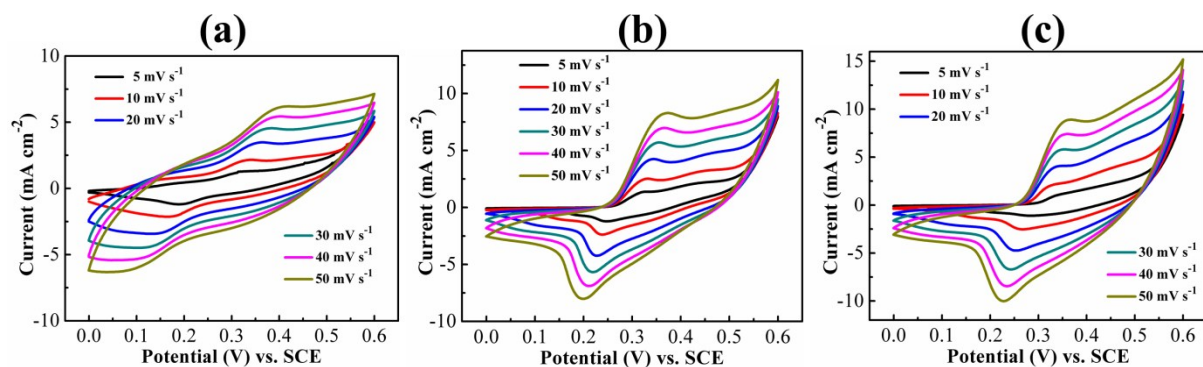

**Figure S1.** CVs of (a)  $\text{MnCo}_2\text{O}_4$  (MCO), (b)  $\text{NiCo}_2\text{O}_4$  (NCO) and (c) MCO-NCO electrodes at different scan rates.

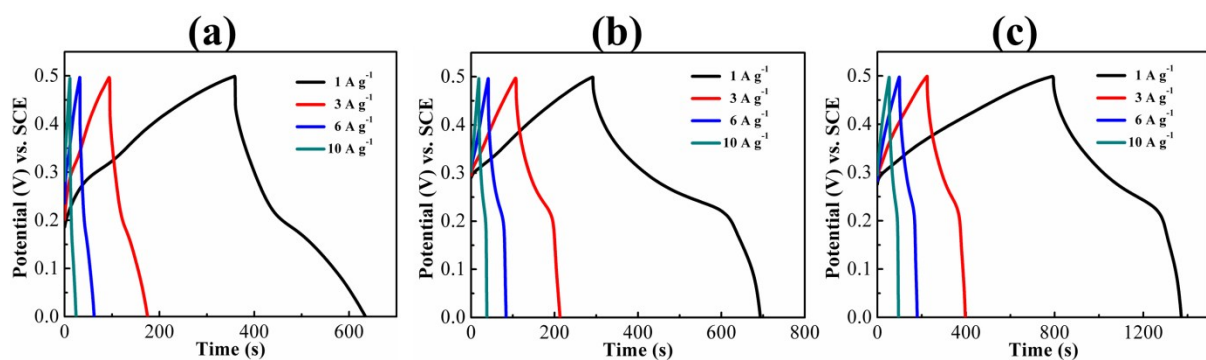

**Figure S2.** Galvanostatic charge-discharge measurements of (a)  $\text{MnCo}_2\text{O}_4$  (MCO), (b)  $\text{NiCo}_2\text{O}_4$  (NCO) and (c) MCO-NCO electrodes at different current densities.

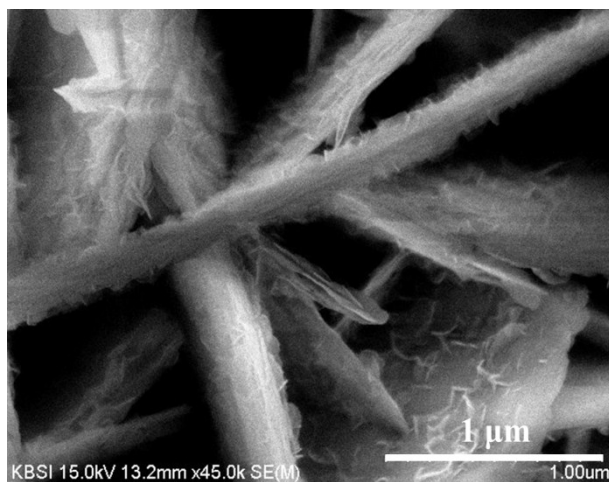

**Figure S3.** Galvanostatic charge-discharge measurements of (a)  $\text{MnCo}_2\text{O}_4$  (MCO), (b)  $\text{NiCo}_2\text{O}_4$  (NCO) and (c) MCO-NCO electrodes at different current densities.

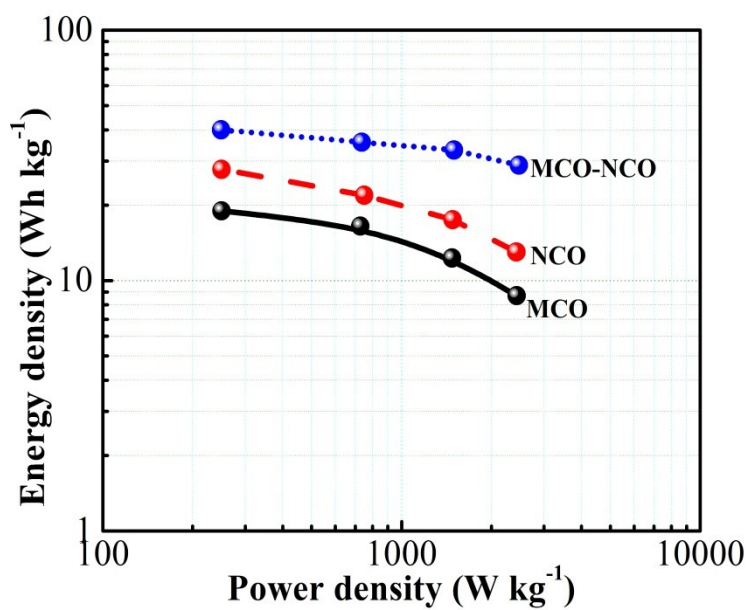

**Figure S4.** Ragone plot of the (a)  $\text{MnCo}_2\text{O}_4$  (MCO), (b)  $\text{NiCo}_2\text{O}_4$  (NCO) and (c) MCO-NCO electrodes.
